# Supplementary material for: Biology, physiology and gene expression of grasshopper Oedaleus asiaticus exposed to diet stress from plant secondary compounds
Source: PubMed Central journal article supplement (PMC5561062; doi:10.1038/s41598-017-09277-z), 2017-08-17
Supplement: 41598_2017_9277_MOESM1_ESM.pdf [file 41598_2017_9277_MOESM1_ESM.pdf]

**Biology, physiology and gene expression of grasshopper *Oedaleus asiaticus* exposed to diet stress from plant secondary compounds**

Xunbing Huang, Jingchuan Ma, Xinghu Qin, Xiongbing Tu, Guangchun Cao, Guangjun Wang, Xiangqun Nong & Zehua Zhang

**Table S1 Designed sequences of qRT-PCR primers for the six genes**

| Grass species                                   | Sequence of primers for real-time PCR (5' to 3') |                         |
|-------------------------------------------------|--------------------------------------------------|-------------------------|
| Cuticle protein 6<br><i>gLCP</i>                | Forward                                          | AGTGTAAGTACTGAGCGCTCTGG |
|                                                 | Reverse                                          | GTCTCCATCTCTTTCGCAGT    |
| TPA_exp: chymotrypsin 2<br><i>gCHY</i>          | Forward                                          | ACGCCAACATCGCCAACTA     |
|                                                 | Reverse                                          | ACGGTGTCGCTGTTGTAGGA    |
| alpha-glucosidase<br><i>gALP</i>                | Forward                                          | CCATCATTTCAGCAGTTCCG    |
|                                                 | Reverse                                          | CAATCACCCAGTTGGACCAC    |
| UDP- glucuronosyltransferase<br>2C1 <i>gUDP</i> | Forward                                          | TGATACCACCGCCACATTC     |
|                                                 | Reverse                                          | AACCCACTGAGGTCCGTCAT    |
| cytochrome P450 6K1<br><i>gP450</i>             | Forward                                          | CCTTCTTGCTGGCTATGAAAC   |
|                                                 | Reverse                                          | CCACATCAATGGTCACTTCTG   |
| Carboxylesterase<br><i>gCAT</i>                 | Forward                                          | ACAGTGGCATCTCGGATG      |
|                                                 | Reverse                                          | TCAGTCGGCGATGTGGAG      |
